# Supplementary material
Source: Research Square preprint supplement (doi:10.21203/rs.3.rs-8939430/v1)
Supplement: Supplementary file 1 [file a5d6a893227c85920e63cad5.docx]

**Supplementary**

**Valorisation of waste lignocellulosic biomass into UV-absorbing lignin: comparative extraction and characterization**

Yogeshwar Vats1&2, Rashid Mumtaz Khan3*, Sayed Sartaj Sohrab4&5, Bhupendra Pratap Singh1*

1Yogeshwer Vats, Department of Environmental Studies, Central University of Haryana, 2Haryana, India. Email: [vatsyogesh01@gmail.com](mailto:vatsyogesh01@gmail.com)

Research Assistant, Environmental and Conservation Sciences, North Dakota State University, USA. Email: [yogeshwar.vats@ndsu.edu](mailto:yogeshwar.vats@ndsu.edu)

3Department of Chemistry, College of Science, Qassim University, Buraidah, Saudi Arabia. Email: [RA.KHAN@qu.edu.sa](mailto:RA.KHAN@qu.edu.sa)

4Special Infectious Agents Unit, King Fahd Medical Research Center, Faculty of Applied Medical Science, King Abdulaziz University, Jeddah 21589, Saudi Arabia. Email: [ssohrab@kau.edu.sa](mailto:ssohrab@kau.edu.sa)

5Department of Medical Laboratory Sciences, Faculty of Applied Medical Sciences, King Abdulaziz University, Jeddah, 21589, Saudi Arabia. Email: [ssohrab@kau.edu.sa](mailto:ssohrab@kau.edu.sa)

1Bhupendra Pratap Singh, Department of Environmental Studies, Central University of Haryana, Haryana, India. Email: [drbpsingh@cuh.ac.in](mailto:drbpsingh@cuh.ac.in)

**Corresponding author*:**

*Dr. Bhupendra Pratap Singh, PhD
Assistant Professor
Department of Environmental Studies
School of Interdisciplinary and Applied Sciences (SIAS)
Central University of Haryana
Jant Pali, Mahendergarh-123029, India

**IoE Fellow, Delhi School of Climate Change and Sustainability, Institute of Eminence, University of Delhi, Delhi, India.**

Email: [bpsingh0783@gmail.com](mailto:bpsingh0783@gmail.com), drbpsingh@cuh.ac.in

<https://orcid.org/0000-0002-0513-9082>

***Dr.Rashid Mumtaz Khan, PhD**

Department of Chemistry,

College of Science, Qassim

University, Buraidah, Saudi Arabia

Mail id: [RA.KHAN@qu.edu.sa](mailto:RA.KHAN@qu.edu.sa)

Orcid id: 0000-0001-6097–098X

**Supplementary Table 1:** Estimated availability of Wheat straw, Cotton stalk, and sawdust of Bamboo & Eucalyptus

| Biomass | Estimated Availability in India (Annually) | Reference |
| --- | --- | --- |
| Wheat straw | 110 - 120 million tonnes | [1] |
| Cotton stalk | 20 - 53 million tonnes | [2] |
| Sawdust (including bamboo, eucalyptus) | 8 - 18 million tonnes | [2] |

**Supplementary Table 2:** Key References Supporting Various UV Applications of Lignin

| Application | Key Findings from Literature | Reference |
| --- | --- | --- |
| Sunscreen SPF enhancement | 10 wt% lignin doubles SPF (15 → 30) with synergic effects | [3] [4] |
| Transparent UV-blocking films | 10 wt% lignin blocks 100% UV-B, 90% UV-A | [5] |
| Antioxidant/Photostability | Lignin reduces ROS by 70% via radical scavenging | [6] |
| Textile coatings | UPF >50 achieved with 5 wt% lignin | [4] |

**References:**

1. Estimates of wheat straw availability and variation in straw quality. (2013). In Range Mgmt. & Agroforestry (Vol. 34, Issue 1, pp. 112–118).
2. Venkatesh, G., Gopinath, K., Sammi Reddy, K., Sanjeeva Reddy, B., Prasad, J., Rajeshwar Rao, G., Pratibha, G., Srinivasarao, C., Ravindra Chary, G., Prabhakar, M., Visha Kumari, V., Shankar, A., Venkateswarlu, B., National Innovations in Climate Resilient Agriculture, & ICAR - Central Research Institute for Dryland Agriculture. (2018). Biochar Production and its Use in Rainfed Agriculture: Experiences from CRIDA. In CRIDA-NICRA Research Bulletin 02/2018 (p. 50). ICAR - Central Research Institute for Dryland Agriculture. <http://www.crida.in>
3. Sadeghifar, H., & Ragauskas, A. (2020). Lignin as a UV Light Blocker—A review. Polymers, 12(5), 1134. <https://doi.org/10.3390/polym12051134>
4. Li, Y., Zhao, S., Song, X., Cao, D., Li, K., Hassanpour, M., & Zhang, Z. (2021b). UV‐Shielding Performance and Color of Lignin and its Application to Sunscreen. Macromolecular Materials and Engineering, 307(2). <https://doi.org/10.1002/mame.202100628>
5. Parit, M., Saha, P., Davis, V. A., & Jiang, Z. (2018). Transparent and homogenous cellulose Nanocrystal/Lignin UV-Protection films. ACS Omega, 3(9), 10679–10691. <https://doi.org/10.1021/acsomega.8b01345>
6. Sarengan, N., Pandian, B. R., Safian, M. T., & Ibrahim, M. N. M. (2025). A review on tailoring lignin derivatives for sunscreen formulations: Structural modification and antioxidant properties for enhanced UV protection. International Journal of Biological Macromolecules, 144871. https://doi.org/10.1016/j.ijbiomac.2025.144871
